# Supplementary material for: Sparse Gene Coexpression Network Analysis Reveals EIF3J‐AS1 as a Prognostic Marker for Breast Cancer
Source: Hindawi journal article supplement (doi:10.1155/2018/1656273), 2018-01-01
Supplement: f4 [file 1656273.f4.docx]

**Table S1. The relationship between CKMT2-AS1 and clinicopathologic characteristics in TCGA cohort.**

| Clinicopathologic characteristics | Low expression | High expression | X2 | P value |
| --- | --- | --- | --- | --- |
| Age |  |  |  |  |
| ≤60 | 320 | 280 | 5.81 | 0.016 |
| ＞60 | 224 | 265 |  |  |
| Tumor size |  |  |  |  |
| ＜2cm | 115 | 161 | 13.47 | 0.001 |
| 2-5cm | 347 | 290 |  |  |
| >5cm | 81 | 92 |  |  |
| Lymph node metastasis |  |  |  |  |
| N0 | 250 | 263 | 5.6 | 0.13 |
| N1 | 173 | 191 |  |  |
| N2 | 69 | 50 |  |  |
| N3 | 42 | 32 |  |  |
| Distant metastasis |  |  |  |  |
| No | 470 | 434 | 0.747 | 0.39 |
| Yes | 14 | 8 |  |  |
| Clinical stage |  |  |  |  |
| Ⅰ-Ⅱ | 389 | 415 | 2.43 | 0.12 |
| Ⅲ-Ⅳ | 143 | 121 |  |  |
| Estrogen receptor |  |  |  |  |
| Negative | 176 | 64 | 68.7 | <2.2e-16 |
| Positive | 340 | 459 |  |  |
| Progesterone receptor |  |  |  |  |
| Negative | 232 | 112 | 64.4 | 1.00e-15 |
| Positive | 282 | 410 |  |  |
