# Supplementary material for: Sparse Gene Coexpression Network Analysis Reveals EIF3J‐AS1 as a Prognostic Marker for Breast Cancer
Source: Hindawi journal article supplement (doi:10.1155/2018/1656273), 2018-01-01
Supplement: f5 [file 1656273.f5.docx]

**Table S2. The relationship between MIR22HG and clinicopathologic characteristics in TCGA cohort.**

| Clinicopathologic characteristics | Low expression | High expression | X2 | P value |
| --- | --- | --- | --- | --- |
| Age | 315 | 285 | 3.24 | 0.072 |
| ≤60 | 229 | 260 |  |  |
| ＞60 |  |  |  |  |
| Tumor size |  |  |  |  |
| ＜2cm | 107 | 169 | 18.78 | 8.4e-05 |
| 2-5cm | 341 | 296 |  |  |
| >5cm | 95 | 78 |  |  |
| Lymph node metastasis |  |  |  |  |
| N0 | 255 | 258 | 0.52 | 0.9 |
| N1 | 181 | 183 |  |  |
| N2 | 59 | 60 |  |  |
| N3 | 40 | 34 |  |  |
| Distant metastasis |  |  |  |  |
| No | 465 | 439 | 0.578 | 0.45 |
| Yes | 9 | 13 |  |  |
| Clinical stage |  |  |  |  |
| Ⅰ-Ⅱ | 399 | 405 | 0.213 | 0.64 |
| Ⅲ-Ⅳ | 136 | 128 |  |  |
| Estrogen receptor |  |  |  |  |
| Negative | 136 | 104 | 4.39 | 0.036 |
| Positive | 389 | 410 |  |  |
| Progesterone receptor |  |  |  |  |
| Negative | 187 | 157 | 2.87 | 0.09 |
| Positive | 336 | 356 |  |  |
