# Supplementary material for: Sparse Gene Coexpression Network Analysis Reveals EIF3J‐AS1 as a Prognostic Marker for Breast Cancer
Source: Hindawi journal article supplement (doi:10.1155/2018/1656273), 2018-01-01
Supplement: f6 [file 1656273.f6.docx]

**Table S3. The relationship between FGF14-AS2 and clinicopathologic characteristics in TCGA cohort.**

| Clinicopathologic characteristics | Low expression | High expression | X2 | P value |
| --- | --- | --- | --- | --- |
| Age |  |  |  |  |
| ≤60 | 290 | 310 | 1.26 | 0.26 |
| ＞60 | 254 | 235 |  |  |
| Tumor size |  |  |  |  |
| ＜2cm | 126 | 150 | 3.88 | 0.14 |
| 2-5cm | 334 | 303 |  |  |
| >5cm | 83 | 90 |  |  |
| Lymph node metastasis |  |  |  |  |
| N0 | 236 | 277 | 17.4 | 0.0006 |
| N1 | 181 | 183 |  |  |
| N2 | 80 | 39 |  |  |
| N3 | 37 | 37 |  |  |
| Distant metastasis |  |  |  |  |
| No | 466 | 438 | 0.0038 | 0.95 |
| Yes | 12 | 10 |  |  |
| Clinical stage |  |  |  |  |
| Ⅰ-Ⅱ | 385 | 419 | 4.99 | 0.025 |
| Ⅲ-Ⅳ | 148 | 116 |  |  |
| Estrogen receptor |  |  |  |  |
| Negative | 126 | 114 | 0.86 | 0.35 |
| Positive | 390 | 409 |  |  |
| Progesterone receptor |  |  |  |  |
| Negative | 188 | 156 | 4.73 | 0.029 |
| Positive | 327 | 365 |  |  |
