# Supplementary material for: Sparse Gene Coexpression Network Analysis Reveals EIF3J‐AS1 as a Prognostic Marker for Breast Cancer
Source: Hindawi journal article supplement (doi:10.1155/2018/1656273), 2018-01-01
Supplement: f7 [file 1656273.f7.docx]

**Table S4. The relationship between LINC01614 and clinicopathologic characteristics in TCGA cohort.**

| Clinicopathologic characteristics | Low expression | High expression | X2 | P value |
| --- | --- | --- | --- | --- |
| Age |  |  |  |  |
| ≤60 | 298 | 302 | 0.02 | 0.88 |
| ＞60 | 246 | 243 |  |  |
| Tumor size |  |  |  |  |
| ＜2cm | 130 | 146 | 3.52 | 0.17 |
| 2-5cm | 316 | 321 |  |  |
| >5cm | 97 | 76 |  |  |
| Lymph node metastasis |  |  |  |  |
| N0 | 268 | 245 | 5.99 | 0.11 |
| N1 | 176 | 188 |  |  |
| N2 | 49 | 70 |  |  |
| N3 | 41 | 33 |  |  |
| Distant metastasis |  |  |  |  |
| No | 439 | 465 | 0.0052 | 0.94 |
| Yes | 10 | 12 |  |  |
| Clinical stage |  |  |  |  |
| Ⅰ-Ⅱ | 409 | 395 | 1.502 | 0.48 |
| Ⅲ-Ⅳ | 127 | 137 |  |  |
| Estrogen receptor |  |  |  |  |
| Negative | 156 | 84 | 27.1 | 1.90e-07 |
| Positive | 364 | 435 |  |  |
| Progesterone receptor |  |  |  |  |
| Negative | 208 | 136 | 22.3 | 2.3e-6 |
| Positive | 309 | 383 |  |  |
